# Supplementary material
Source: PubMed Central journal article supplement (PMC4177337)
Supplement: NIHMS607195-supplement-01.pdf [file NIHMS607195-supplement-01.pdf]

**Table S1. Baseline Characteristics of HIV-Infected Women, Stratified by Inclusion/Exclusion Status**

| Parameter            | Included<br>N = 908 | Excluded<br>N = 508 | P-value |
|----------------------|---------------------|---------------------|---------|
| Baseline Age,* years | 41 (36-46)          | 42 (36-47)          | 0.05    |
| <30                  | 55 (6%)             | 60 (12%)            |         |
| 30-40                | 350 (39%)           | 181 (36%)           |         |
| 40-50                | 410 (45%)           | 196 (39%)           |         |
| 50                   | 93 (10%)            | 71 (14%)            |         |
| Race, N (%)          |                     |                     | 0.7     |
| African-American     | 524 (58%)           | 263 (56%)           |         |
| Caucasian            | 175 (19%)           | 89 (19%)            |         |
| Other                | 209 (23%)           | 118 (25%)           |         |
| Current CD4          | 397 (245-576)       | 315 (147-578)       | <0.001  |
| Nadir CD4            | 212 (109-326)       | 181 (89-315)        | 0.03    |
| History of AIDS      | 445 (49%)           | 259 (51%)           | 0.5     |
| HIVRNA Level:        |                     |                     | <0.001  |
| <80                  | 276 (31%)           | 105 (24%)           |         |
| 80-2000              | 204 (23%)           | 91 (21%)            |         |
| 2000-9999            | 147 (16%)           | 55 (13%)            |         |
| >10000               | 275 (30%)           | 188 (43%)           |         |
| Hepatitis C          | 281 (31%)           | 201 (40%)           | 0.002   |
| eGFR creat (MDRD)    | 94 (77-113)         | 88 (73-103)         | 0.002   |
| eGFR creat (CKD-Epi) | 99 (81-114)         | 94 (76-112)         | 0.002   |
| Serum Albumin (g/dL) | 4.0 (3.8-4.3)       | 3.9 (3.5-4.1)       | <0.001  |

\*Data are presented as Median (IQR) where indicated; otherwise presented as N (%).
