# Supplementary material
Source: PubMed Central journal article supplement (PMC4177337)
Supplement: NIHMS607195-supplement-02.pdf [file NIHMS607195-supplement-02.pdf]

**TABLE S2.** Associations of serum albumin concentration with annual change\* in eGFRcr in HIV-infected WIHS participants.

|                                  | <b>Unadjusted<br/>Estimate (95% CI)</b> | <b>P Value</b> | <b>Adjusted<br/>without ACR **<br/>Estimate (95% CI)</b> | <b>P Value</b> | <b>Adjusted<br/>with ACR **<br/>Estimate (95% CI)</b> | <b>P Value</b> |
|----------------------------------|-----------------------------------------|----------------|----------------------------------------------------------|----------------|-------------------------------------------------------|----------------|
| <b>Continuous Predictors</b>     |                                         |                |                                                          |                |                                                       |                |
| Serum Albumin (per -0.5 g/dL)    | -0.59 (-0.79, -0.40)                    | p<0.001        | -0.52 (-0.71, -0.32)                                     | p<.0001        | -0.48 (-0.68, -0.29)                                  | p<0.001        |
| ACR (per doubling)               | -0.22 (-0.33, -0.12)                    | p<0.001        |                                                          |                | -0.24 (-0.34, -0.15)                                  | p<0.001        |
| Baseline eGFRcr (per ↑10 ml/min) | -0.72 (-0.82, -0.62)                    | p<0.001        | -0.82 (-0.92, -0.72)                                     | p<.0001        | -0.84 (-0.94, -0.75)                                  | p<0.001        |
| <b>Dichotomized Predictors</b>   |                                         |                |                                                          |                |                                                       |                |
| Serum Albumin < 3.8 g/dL         | -0.64 (-1.02, -0.26)                    | p=0.0010       | -0.40 (-0.78, -0.016)                                    | p=0.041        | -0.32 (-0.69, 0.063)                                  | p=0.10         |
| ACR ≥ 30 mg/g                    | -0.86 (-1.43, -0.29)                    | p=0.0033       |                                                          |                | -1.30 (-1.84, -0.76)                                  | p<.0001        |
| Baseline eGFRcr<60 ml/min        | 4.66 (3.71, 5.61)                       | p<.0001        | 4.65 (3.74, 5.57)                                        | p<.0001        | 5.14 (4.21, 6.07)                                     | p<.0001        |

\* Results reported as estimated annual change (95% confidence interval) calculated from multivariable linear mixed models.

\*\* Adjusted models control for age, race, HIV RNA, CD4, HCV, DM, ARV use, baseline eGFR, SBP, DBP, BMI, and study site. For ACR as a predictor instead of adjusting for ACR the full model adjusts for serum albumin concentration.

\*\*\*ARV included current combination antiretroviral therapy (cART) use, current nucleoside reverse transcriptase inhibitor (NRTI) use, current non-nucleoside reverse transcriptase inhibitor (NNRTI) use, and current protease inhibitor (PI) use.
